# Supplementary material for: Loss of UCP2 Attenuates Mitochondrial Dysfunction without Altering ROS Production and Uncoupling Activity
Source: PubMed Central journal article supplement (PMC4063685; doi:10.1371/journal.pgen.1004385), 2014-06-19
Supplement: pgen.1004385.s001.pdf [file pgen.1004385.s001.pdf]

A

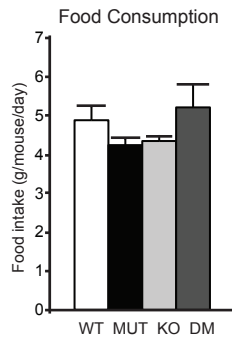

B

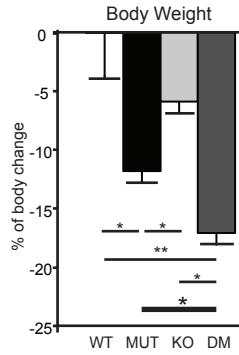

C

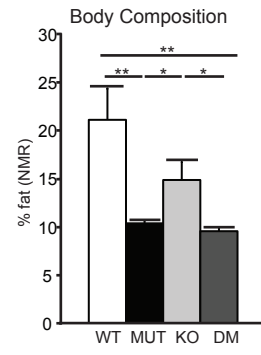

D

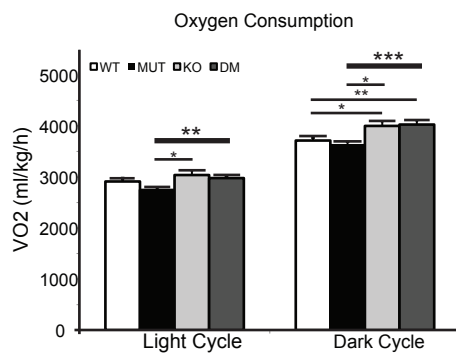

E

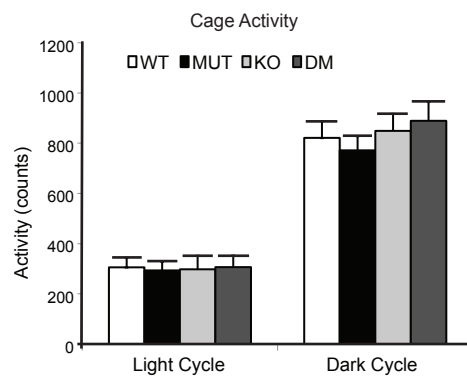

F

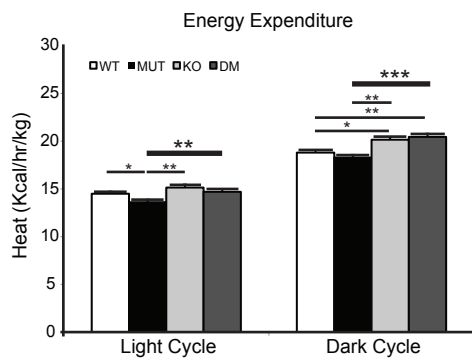

G

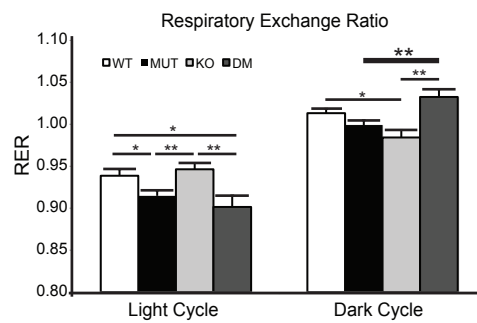

Kukat et al. Figure S1.
